# Supplementary material for: Assessing and Evaluating the Scope and Constraints of Idylla Molecular Assays by Using Different Source Materials in Routine Diagnostic Settings
Source: MDPI journal article supplement (doi:10.3390/ijms232012515), 2022-10-19
Supplement: s1 [file s1]

## Supplementary Materials

**Table S1.** Testing the repeatability of all Idylla assays for different sample types (A-G).

|                   | Conclusion of Idylla Test - Cq Value - EGFR Control/ NRAS Control/ KRAS Target Cq Value/ BRAF Target Cq Value |       |       |       |         |                                |
|-------------------|---------------------------------------------------------------------------------------------------------------|-------|-------|-------|---------|--------------------------------|
| Sample Type       | RUN 1                                                                                                         | RUN 2 | RUN 3 | Mean  | STD DEV | Coefficient of variation (CV%) |
| SAMPLE TYPE A     |                                                                                                               |       |       |       |         |                                |
| EGFR              | 19.9                                                                                                          | 19.7  | 19.6  | 19.73 | 0.15    | 0.76                           |
| BRAF              | 33.56                                                                                                         | 33.47 | 33.68 | 33.57 | 0.1     | 0.29                           |
| KRAS              | 23.98                                                                                                         | 23.65 | 23.79 | 23.8  | 0.16    | 0.67                           |
| NRAS-BRAF         | 41.82                                                                                                         | 41.68 | 41.58 | 41.69 | 0.12    | 0.28                           |
| MSI               | 7                                                                                                             | 7     | 7     | 7     | 0       | 0                              |
| Genefusion        | 27.7                                                                                                          | 27.4  | 27.5  | 27.53 | 0.15    | 0.54                           |
| SAMPLE TYPE B     |                                                                                                               |       |       |       |         |                                |
| EGFR              | 19.5                                                                                                          | 20.2  | 21    | 20.23 | 0.75    | 3.7                            |
| BRAF              | 37.57                                                                                                         | 38.45 | 37.89 | 37.97 | 0.44    | 1.15                           |
| KRAS              | 29.45                                                                                                         | 29.56 | 30.5  | 29.83 | 0.57    | 1.91                           |
| NRAS-BRAF         | 44.82                                                                                                         | 42.68 | 41.58 | 43.02 | 1.64    | 3.81                           |
| MSI               | 6                                                                                                             | 6     | 6     | 6     | 0       | 0                              |
| Genefusion        | 26.1                                                                                                          | 25.6  | 26.7  | 26.13 | 0.55    | 2.1                            |
| SAMPLE TYPE C / F |                                                                                                               |       |       |       |         |                                |
| EGFR              | 20.2                                                                                                          | 20.5  | 20.8  | 20.5  | 0.3     | 1.46                           |
| BRAF              | 34.57                                                                                                         | 35.01 | 34.89 | 34.82 | 0.22    | 0.63                           |
| KRAS              | 25.57                                                                                                         | 25.12 | 25.32 | 25.33 | 0.22    | 0.86                           |
| NRAS-BRAF         | 42.36                                                                                                         | 41.97 | 42.62 | 42.31 | 0.32    | 0.75                           |
| MSI               | 7                                                                                                             | 7     | 7     | 7     | 0       | 0                              |
| Genefusion        | 29.4                                                                                                          | 29.8  | 29.6  | 29.6  | 0.2     | 0.67                           |
| SAMPLE TYPE D / G |                                                                                                               |       |       |       |         |                                |
| EGFR              | 22.6                                                                                                          | 23.1  | 23.5  | 23.06 | 0.45    | 1.95                           |
| BRAF              | 37.77                                                                                                         | 38.21 | 37.52 | 37.83 | 0.34    | 0.89                           |
| KRAS              | 31.68                                                                                                         | 31.82 | 31.24 | 31.58 | 0.3     | 0.94                           |
| NRAS-BRAF         | 43.3                                                                                                          | 44.5  | 43.9  | 43.9  | 0.6     | 1.36                           |
| MSI               | 7                                                                                                             | 7     | 7     | 7     | 0       | 0                              |
| Genefusion        | 26.8                                                                                                          | 27.1  | 26.5  | 26.8  | 0.3     | 1.11                           |

|                                                                                                                                                                                                                                                                      |  |  |  |  |  |  |
|----------------------------------------------------------------------------------------------------------------------------------------------------------------------------------------------------------------------------------------------------------------------|--|--|--|--|--|--|
|                                                                                                                                                                                                                                                                      |  |  |  |  |  |  |
| A= FFPE -2µM slide- scratched; B= HE slide- scratched; C= DNA Input from FFPE scratched slide; D= DNA Input from HE scratched slide; F= RNA Input from FFPE scratched slide; G= RNA Input from HE scratched slide; N/A=not applicable; Cq value=quantification cycle |  |  |  |  |  |  |

**Table S2.** Testing the performance of the archival tissue samples in 2µM FFPE tissue sections (Sample type A). List of the additional samples tested along with the others mentioned in the results table 1 and 2.

| Case # | Tissue preparation year | Tumor cells (%) | Cancer type    | Previous Result                      | Idylla cartridge used | Idylla result-concordance |
|--------|-------------------------|-----------------|----------------|--------------------------------------|-----------------------|---------------------------|
| S1     | 2013                    | 95%             | NSCLC          | EGFR - Ex21:p.L858R                  | EGFR                  | YES                       |
| S2     | 2014                    | 70%             | NSCLC          | EGFR - Ex 19: p. E746_S752delinsA    | EGFR                  | YES                       |
| S3     | 2012                    | 85%             | NSCLC          | EGFR-WT                              | EGFR                  | YES                       |
| S4     | 2015                    | 75%             | Melanoma       | BRAF-Ex15:p.V600E, NRAS-WT           | NRAS/<br>BRAF         | YES                       |
| S5     | 2014                    | 70%             | CRC            | NRAS -Ex 3:p.Q61R<br>BRAF-WT         | NRAS/<br>BRAF         | YES                       |
| S6     | 2005<br>(MTB)           | 60%             | CRC            | KRAS- Ex2:p.G12C<br>KRAS- Ex2:p.G12D | KRAS                  | YES                       |
| S7     | 2009                    | 50%             | CRC            | KRAS- Ex 2:p.G13D                    | KRAS                  | YES                       |
| S8     | 2013                    | 70%             | NSCLC          | KRAS- Ex 2:p.G12C                    | KRAS                  | YES                       |
| S9     | 2014                    | 80%             | Thyroid cancer | BRAF-Ex15:p.V600E                    | BRAF                  | YES                       |
| S10    | 2016                    | 85%             | Melanoma       | BRAF-Ex15:p.V600E                    | BRAF                  | YES                       |
| S11    | 2011                    | 70%             | CRC            | MSI High (5/10 System instable)      | MSI                   | YES                       |
| S12    | 2010                    | 80%             | CRC            | MSS                                  | MSI                   | YES                       |
| S13    | 2011                    | 90%             | CRC            | MSS                                  | MSI                   | YES                       |
| S14    | 2010                    | 80%             | NSCLC          | Fusions - Wildtype                   | Gene fusion           | YES                       |
| S15    | 2012                    | 90%             | NSCLC          | ALK fusion ALK::EML4                 | Gene fusion           | YES                       |

## Case 11 - multi tissue block – Prepared on 08.01.2009

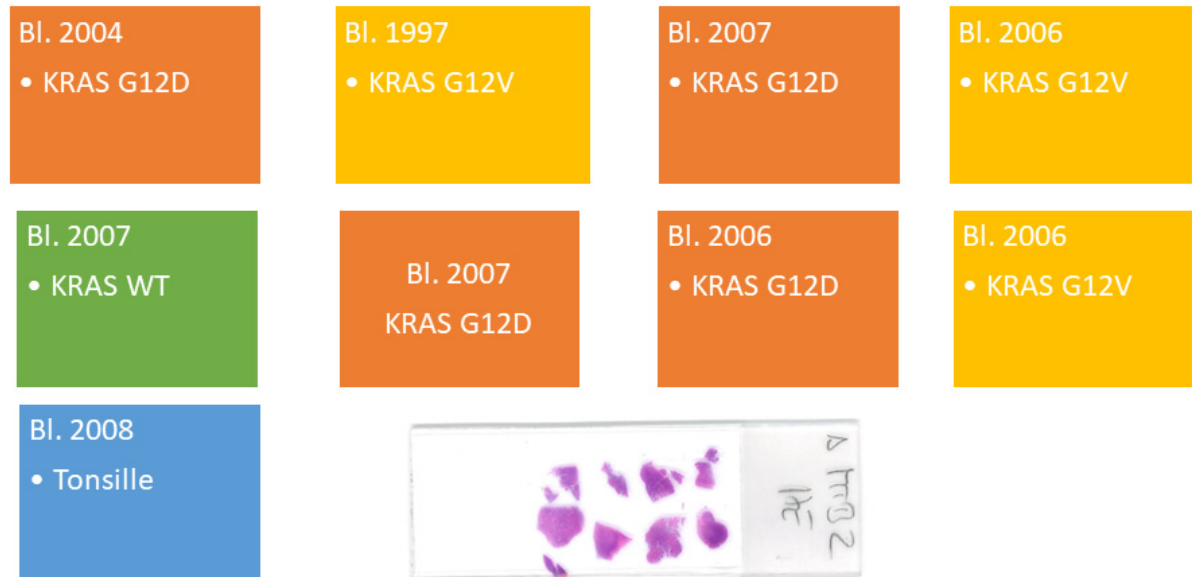

**Figure S1.** Case 11- schematic representation of the multi tissue section of case 11 with their respective KRAS mutation depictions with the year of the prepared original FFPE block. The HE stained slide of the MTB is also presented for reference.
